# Supplementary material for: Management of hypertensive disorders in pregnancy in Black women: a systematic review
Source: Research Square preprint supplement (doi:10.21203/rs.3.rs-191253/v1), 2021-02-01
Supplement: Supplementary file 2 [file 0c61c839b6d397cc3468e25c.docx]

**Appendix S1.** Database searches and search strategies

**Database searches:**

Medline (via OVID): n = 430

Embase (via OVID): n = 650

PubMed: n = 215

Total: n = 1295

Duplicates: n = 899

**Total (with duplicates removed): n = 396**

**Search Strategies:**

1. Pre-eclamp*
2. Pre ADJ eclamp*
3. Hypertens* AND pregnan*
4. Blood ADJ pressure
5. (((#1 or #2) or #3) or #4)))
6. Anti ADJ hypertens*
7. Nifedipine
8. Calcium-channel ADJ blocker
9. Amlodipine
10. Felodipine
11. Isradipine
12. Norvasc
13. Cardizem la
14. Tiazac
15. Plendil
16. Dynacirc
17. Adalat
18. Procardia
19. Nicardipine
20. Cardene
21. Nimodipine
22. Nimotop
23. Nisoldipine
24. Sular
25. Verapamil
26. Covera-hs
27. Verelan pm
28. Calan
29. OR\(6-29)
30. Randomise* AND control* AND trial
31. 5 AND 29 AND 30

**Figure S1.** PRISMA flow diagram of study selection.

Full-text articles excluded, with reasons
(n = 79)

No race/ethnicity data: 65

No full text: 7

Not English: 4

Outcome of interest not reported: 3

Studies included in quantitative synthesis
(n = 1)

Records identified through database searching
(n = 1295)

Full-text articles assessed for eligibility
(n = 80)

Records excluded
(n = 316)

Records screened
(n =396)

Records after duplicates removed
(n = 396)

## Identification

## Eligibility

## Included

## Screening
